# Supplementary material for: Molecular phylogeny of the Athetini–Lomechusini–Ecitocharini clade of aleocharine rove beetles (Insecta)
Source: PubMed Central journal article supplement (PMC3532658; doi:10.1111/j.1463-6409.2012.00553.x), 2012-06-20
Supplement: zsc0041-0617-SD2.pdf [file zsc0041-0617-SD2.pdf]

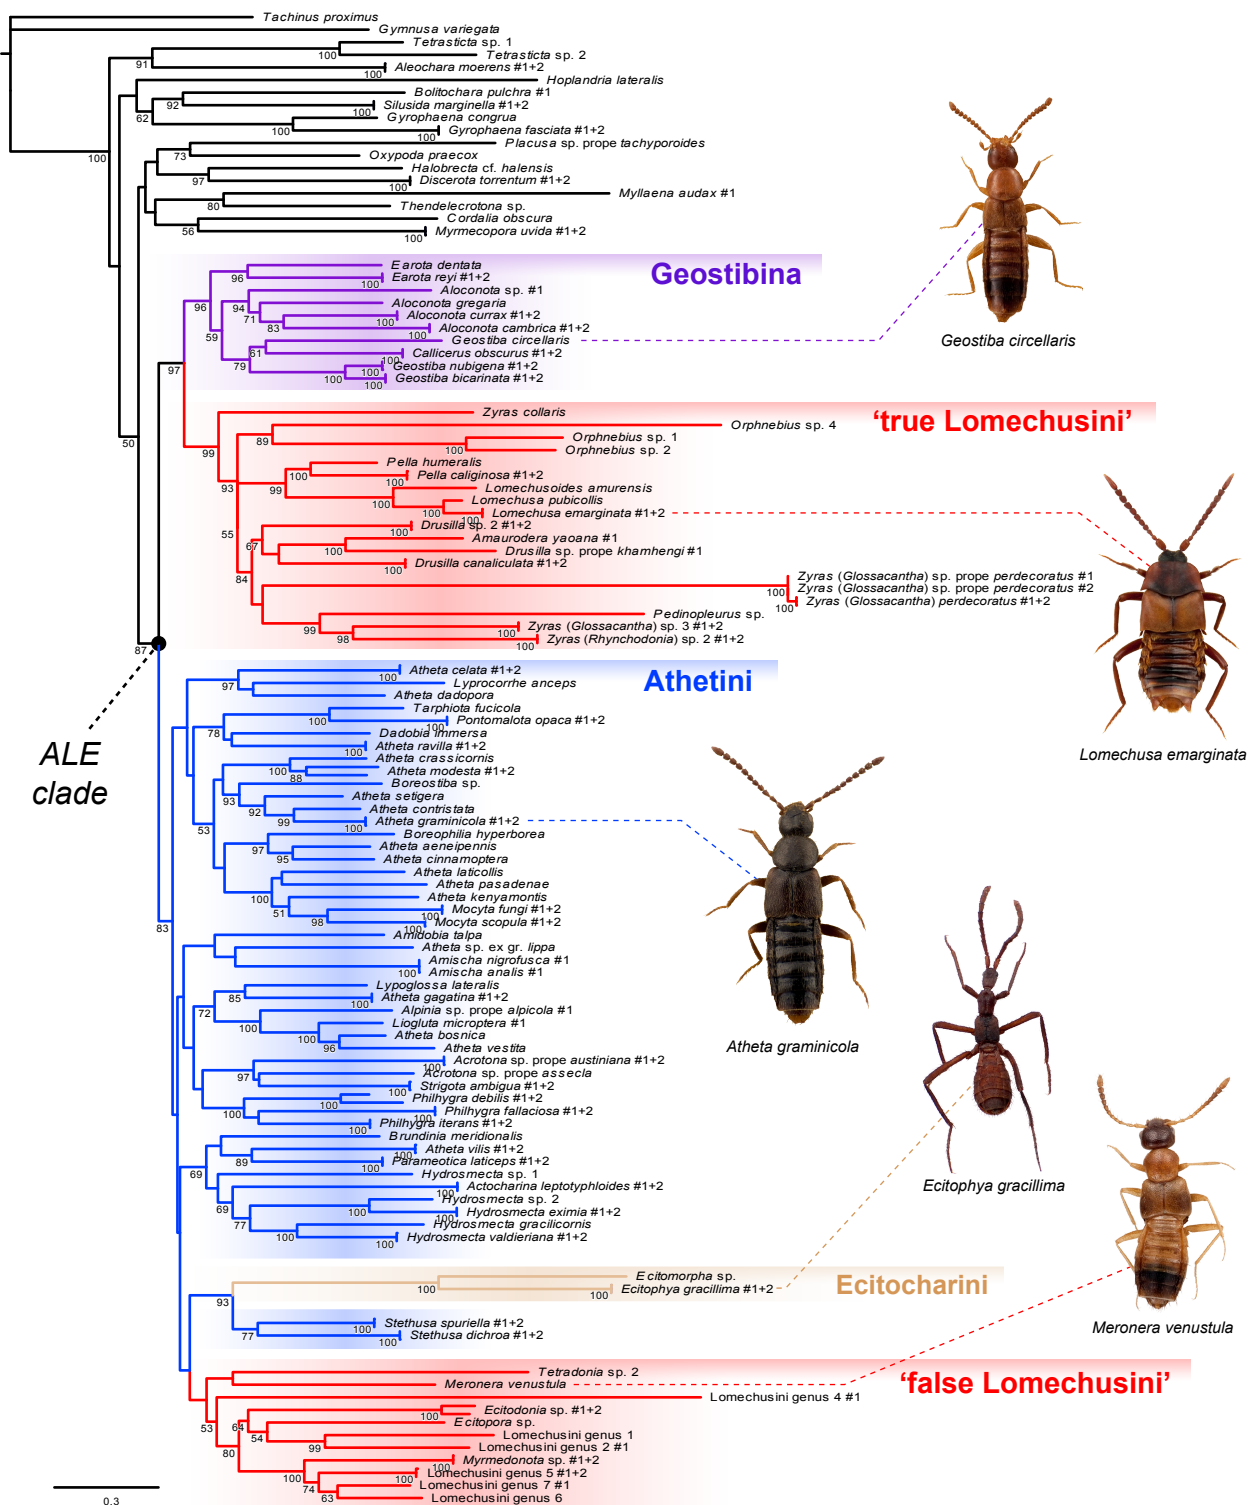

**Supplementary Figure S1** Best tree from the Maximum Likelihood analysis with incomplete sequences excluded. Bootstrap values  $\geq 50\%$  are indicated under the branches. The labels of conspecific specimens have been combined to save space.
