# Supplementary material for: Molecular phylogeny of the Athetini–Lomechusini–Ecitocharini clade of aleocharine rove beetles (Insecta)
Source: PubMed Central journal article supplement (PMC3532658; doi:10.1111/j.1463-6409.2012.00553.x), 2012-06-20
Supplement: zsc0041-0617-SD3.pdf [file zsc0041-0617-SD3.pdf]

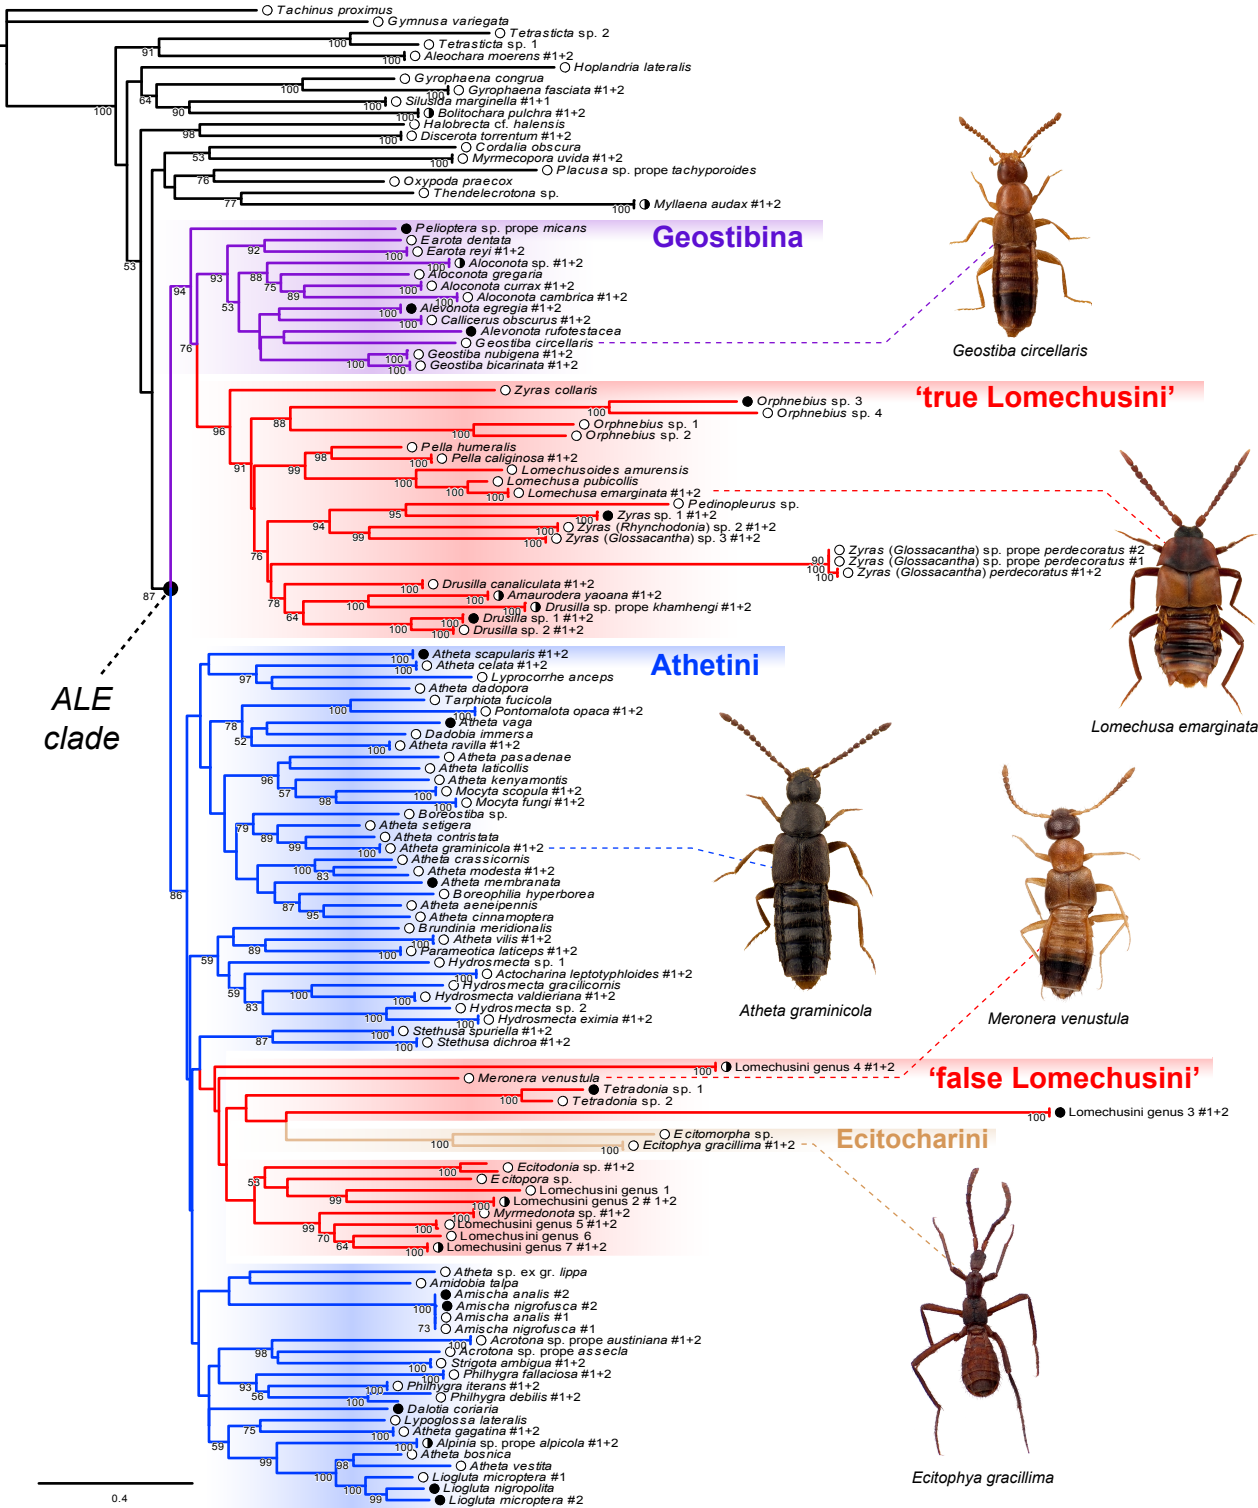

**Supplementary Figure S2** Best tree from the Maximum Likelihood analysis with incomplete sequences included. Bootstrap values  $\geq 50\%$  are indicated under the branches. The labels of conspecific specimens have been combined to save space, except where the specimens did not group together. Complete sequences are indicated with open circles, incomplete with solid circles. Half-solid circles indicate pairs of conspecific specimens with one having incomplete sequence.
