# Supplementary material for: Molecular phylogeny of the Athetini–Lomechusini–Ecitocharini clade of aleocharine rove beetles (Insecta)
Source: PubMed Central journal article supplement (PMC3532658; doi:10.1111/j.1463-6409.2012.00553.x), 2012-06-20
Supplement: zsc0041-0617-SD4.pdf [file zsc0041-0617-SD4.pdf]

**Supplementary Table S1** Label information for the specimens included in this study. The specimens marked with asterisk (\*) are on loan from the Natural History Museum of Denmark (ZMUC) and will be divided between ZMUC and the Natural History Museum, University of Oslo (ZMUN) upon completion of the project. The remaining specimens are deposited at ZMUN.

| ZMUN barcode | Species                                                   | Label information                                                                                                                                                                                                                   |
|--------------|-----------------------------------------------------------|-------------------------------------------------------------------------------------------------------------------------------------------------------------------------------------------------------------------------------------|
| 10002544     | <i>Acrotona</i> sp. prope <i>assecla</i> (Casey, 1910)    | U.S.A., Tennessee, Sevier Co., 9.5 km NEE Gatlinburg, Great Smoky Mountains National Park, Greenbrier, nr. entrance, 35°44.265'N 83°24.976'W ±6m, h=455m, in hay [2447] [Garmin eTrex; WGS84], 30.vi.2006, Leg. V.I.Gusarov         |
| 10002543     | <i>Acrotona</i> sp. prope <i>austiniana</i> (Casey, 1910) | U.S.A., Tennessee, Sevier Co., 11.5 km E Gatlinburg, Great Smoky Mountains National Park, Greenbrier, pavilion, 35°42.219'N 83°23.165'W ±9m, h=575m, light trap [2419] [Garmin eTrex; WGS84], 24.vi.2006, Leg. V.I.Gusarov          |
| 10002547     | <i>Acrotona</i> sp. prope <i>austiniana</i> (Casey, 1910) | U.S.A., Tennessee, Sevier Co., 11.5 km E Gatlinburg, Great Smoky Mountains National Park, Greenbrier, pavilion, 35°42.219'N 83°23.165'W ±9m, h=575m, light trap [2419] [Garmin eTrex; WGS84], 24.vi.2006, Leg. V.I.Gusarov          |
| 10002656     | <i>Actocharina leptotyphloides</i> (Bernhauer, 1907)      | Austria, Tirol, Bezirk Reutte, W of Stanzach, nr. Hwy. 198 Lech River (left bank opposite Stanzach), 47°22.938'N 10°33.153'E ±12m, h=942m, flooding river banks [3348] [Garmin 60CSx; WGS84], 10.v.2008, Leg. V.I.Gusarov & H.Elven |
| 10002657     | <i>Actocharina leptotyphloides</i> (Bernhauer, 1907)      | Austria, Tirol, Bezirk Reutte, W of Stanzach, nr. Hwy. 198 Lech River (left bank opposite Stanzach), 47°22.938'N 10°33.153'E ±12m, h=942m, flooding river banks [3348] [Garmin 60CSx; WGS84], 10.v.2008, Leg. V.I.Gusarov & H.Elven |
| 10002579     | <i>Aleochara moerens</i> Gyllenhal, 1827                  | Norway, Sør-Trøndelag, Røros kommune, 31 km SE Røros, 3 km NEE Langen, Rundtjønn Lake, NW bank, 62°26.784'N 11°54.583'E ±8m, h=659m, in fungi [2173] [Garmin eTrex; WGS84], 15.viii.2005, Leg. V.I.Gusarov                          |
| 10002570     | <i>Aleochara moerens</i> Gyllenhal, 1827                  | Norway, Sør-Trøndelag, Røros kommune, 31 km SE Røros, 3 km NEE Langen, Rundtjønn Lake, NW bank, 62°26.784'N 11°54.583'E ±8m, h=659m, in fungi [2173] [Garmin eTrex; WGS84], 15.viii.2005, Leg. V.I.Gusarov                          |
| 10030889     | <i>Alevonota egregia</i> (Rye, 1876)                      | France, Pyrénées-Orientales, forêt de Rabouillet-Boucheville, h=800–1100m, filet de voiture, 6.v.2008, Leg. M.Tronquet                                                                                                              |
| 10030891     | <i>Alevonota egregia</i> (Rye, 1876)                      | France, Pyrénées-Orientales, forêt de Rabouillet-Boucheville, h=800–1100m, filet de voiture, 6.v.2008, Leg. M.Tronquet                                                                                                              |
| 10030810     | <i>Alevonota rufotestacea</i> (Kraatz, 1856)              | France, Pyrénées-Orientales, forêt de Rabouillet-Boucheville, h=800–1100m, filet de voiture, 6.v.2008, Leg. M.Tronquet                                                                                                              |

|           |                                                         |                                                                                                                                                                                                                                                                                          |
|-----------|---------------------------------------------------------|------------------------------------------------------------------------------------------------------------------------------------------------------------------------------------------------------------------------------------------------------------------------------------------|
| 10030823  | <i>Aloconota cambrica</i> (Wollaston, 1855)             | Austria, Tirol, Bezirk Reutte, 5 km SW Reutte, nr. Hwy. 198 Lech River (left bank), 47°27.049'N 10°39.777'E ±4m, h=870m, near river, bare ground [3345] [Garmin 60CSx; WGS84], 10.v.2008, Leg. V.I.Gusarov                                                                               |
| 10029295  | <i>Aloconota cambrica</i> (Wollaston, 1855)             | Austria, Oberösterreich, Bezirk Kirchdorf an der Krems, 1 km N Molln, Gstadt, Krumme Steyrling, 47°53.676'N 14°15.351'E ±6m, h=383m, flooding river banks, stones, gravel, sand [3312] [Garmin 60CSx; WGS84], 6.v.2008, Leg. V.I.Gusarov & H.Elven                                       |
| 10029300  | <i>Aloconota currax</i> (Kraatz, 1856)                  | Austria, Oberösterreich, Bezirk Kirchdorf an der Krems, 1 km N Molln, Gstadt, Krumme Steyrling, 47°53.676'N 14°15.351'E ±6m, h=383m, flooding river banks, stones, gravel, sand [3312] [Garmin 60CSx; WGS84], 6.v.2008, Leg. V.I.Gusarov & H.Elven                                       |
| 10029301  | <i>Aloconota currax</i> (Kraatz, 1856)                  | Austria, Oberösterreich, Bezirk Kirchdorf an der Krems, 1 km N Molln, Gstadt, Krumme Steyrling, 47°53.676'N 14°15.351'E ±6m, h=383m, flooding river banks, stones, gravel, sand [3312] [Garmin 60CSx; WGS84], 6.v.2008, Leg. V.I.Gusarov & H.Elven                                       |
| 10029294  | <i>Aloconota gregaria</i> (Erichson, 1839)              | Norway, Oslo, Oslo kommune, Kantarellen Terrasse, peninsula, 59°50.481'N 10°46.571'E ±6m (extent=20m), h=9m, sifting leaf litter and moss [3696] [Garmin 60CSx; WGS84], 25.iv.2009, Leg. V.I.Gusarov                                                                                     |
| 10030840  | <i>Aloconota</i> sp.                                    | Uganda, Western Region, Kasese District, 3.5 km NW Nyakalengija, Rwenzori Mts. National Park, main trail to Nyabitaba Hut, 0°21.679'N 30°00.890'E ±11m (extent=10m), h=1837m, river bank, at the edge of water, sand, stones [3523] [Garmin 60CSx; WGS84], 5.viii.2008, Leg. V.I.Gusarov |
| 10030746  | <i>Aloconota</i> sp.                                    | Uganda, Western Region, Kasese District, 3.5 km NW Nyakalengija, Rwenzori Mts. National Park, main trail to Nyabitaba Hut, 0°21.679'N 30°00.890'E ±11m (extent=10m), h=1837m, river bank, at the edge of water, sand, stones [3523] [Garmin 60CSx; WGS84], 5.viii.2008, Leg. V.I.Gusarov |
| 10029305  | <i>Alpinia</i> sp. prope <i>alpicola</i> (Miller, 1859) | Romania, jud. Prahova, Munții Bucegi, M-le Babele, 2 km SW Vf. Coștila, 45°25'04"N 25°28'13"E, h=2290m, rocky alpine pasture at path, edge of melting snow patch, at/under stones [217], 28.vi.2006, Leg. Gy.Makranczy                                                                   |
| 10002644  | <i>Alpinia</i> sp. prope <i>alpicola</i> (Miller, 1859) | Romania, jud. Prahova, Munții Bucegi, M-le Babele, 2 km SW Vf. Coștila, 45°25'04"N 25°28'13"E, h=2290m, rocky alpine pasture, on path, edge of melting snow patch, near/under stones [217], 28.vi.2006, Leg. Gy.Makranczy                                                                |
| 10030878* | <i>Amaurodera yaoana</i> Pace, 1992                     | Laos, Champasak prov.: Bolaven plateau, Muang Paxong, Ban Thongvay, 15°14.741'N 106°31.916'E, h=1300m, disturbed primary rainforest; flight intercept trap [LAO08-5a], 9–16.vi.2008, Leg. A.Solodovnikov & J.Pedersen                                                                    |

|           |                                            |                                                                                                                                                                                                                            |
|-----------|--------------------------------------------|----------------------------------------------------------------------------------------------------------------------------------------------------------------------------------------------------------------------------|
| 10030812* | <i>Amaurodera yaoana</i> Pace, 1992        | Laos, Champasak prov.: Bolaven plateau, Muang Paxong, Ban Thongvay, 15°14.741'N 106°31.916'E, h=1300m, disturbed primary rainforest; flight intercept trap [LAO08-5a], 9–16.vi.2008, Leg. A.Solodovnikov & J.Pedersen      |
| 10002646  | <i>Amidobia talpa</i> (Heer, 1841)         | Norway, AK, Oslo: Vettakollen, Båntjern, (UTM) 32V 05952,66487, on anthill ( <i>F. rufa</i> group) in mixed forest [WGS84], 4.v.2006, Leg. H.Elven                                                                         |
| 10029292  | <i>Amischa analis</i> (Gravenhorst, 1802)  | Norway, Oslo, Oslo kommune, below Kantarellen Terrasse, 59°50.965'N 10°48.924'E ±4m (extent=20m), h=134m, under stones and sifting dead grass near mice burrows [3693] [Garmin 60CSx; WGS84], 19.iv.2009, Leg. V.I.Gusarov |
| 10002623  | <i>Amischa analis</i> (Gravenhorst, 1802)  | Norway, Akershus, Rælingen, Årnestangen, E bank of the river, 59°53.177'N 11°08.197'E ±8m, h=100m, flood refuse [2356] [Garmin eTrex; WGS84], 7.vi.2006, Leg. V.I.Gusarov                                                  |
| 10029304  | <i>Amischa nigrofusca</i> (Stephens, 1832) | Norway, Oslo, Oslo kommune, below Kantarellen Terrasse, 59°50.965'N 10°48.924'E ±4m (extent=20m), h=134m, under stones and sifting dead grass near mice burrows [3693] [Garmin 60CSx; WGS84], 19.iv.2009, Leg. V.I.Gusarov |
| 10002622  | <i>Amischa nigrofusca</i> (Stephens, 1832) | Norway, Akershus, Rælingen, Årnestangen, E bank of the river, 59°53.177'N 11°08.197'E ±8m, h=100m, flood refuse [2356] [Garmin eTrex; WGS84], 7.vi.2006, Leg. V.I.Gusarov                                                  |
| 10002583  | <i>Atheta aeneipennis</i> (Thomson, 1856)  | Norway, Sør-Trøndelag, Røros kommune, 31 km SE Røros, 3 km NEE Langen, Rundtjønn Lake, W bank, 62°26.584–.489'N 11°54.464–640'E ±14m, h=680m, in fungi [2172] [Garmin eTrex; WGS84], 13.viii.2005, Leg. V.I.Gusarov        |
| 10002638  | <i>Atheta bosnica</i> Ganglbauer, 1895     | Romania, jud. Prahova, Munții Bucegi, 0.5 km W Vîrful cu Dor, 45°21'06"N 25°28'56"E, h=1950m, isolated snow patch below summit, in/under grass and stones at the edge of melting snow [213], 27.vi.2006, Leg. Gy.Makranczy |
| 10002560  | <i>Atheta celata</i> (Erichson, 1837)      | Norway, Akershus, Rælingen, Årnestangen, E bank of the river, 59°53.279'N 11°08.062'E ±7m, h=100m, flood refuse on previously flooded field [2357] [Garmin eTrex; WGS84], 7.vi.2006, Leg. V.I.Gusarov                      |
| 10002556  | <i>Atheta celata</i> (Erichson, 1837)      | Norway, Akershus, Rælingen, Årnestangen, E bank of the river, 59°53.279'N 11°08.062'E ±7m, h=100m, flood refuse on previously flooded field [2357] [Garmin eTrex; WGS84], 7.vi.2006, Leg. V.I.Gusarov                      |
| 10002582  | <i>Atheta cinnamoptera</i> (Thomson, 1856) | Norway, env. of Oslo, 2 km SE Skullerud, 59°50.983'N 10°51.263'E ±9m, h=180m, on fungi [2179] [Garmin eTrex; WGS84], 28.viii.2005, Leg. V.I.Gusarov                                                                        |
| 10002635  | <i>Atheta contristata</i> (Kraatz, 1856)   | Romania, jud. Alba, 1 km NE Scărișoara, Corobana Mîndrutului (cave), entrance zone, 46°27'44"N 22°53'18"E, h=760m, under/around wet stones, on dead insects [224], 30.vi.2006, Leg. Gy.Makranczy                           |

|          |                                               |                                                                                                                                                                                                                                                                  |
|----------|-----------------------------------------------|------------------------------------------------------------------------------------------------------------------------------------------------------------------------------------------------------------------------------------------------------------------|
| 10002640 | <i>Atheta crassicornis</i> (Fabricius, 1793)  | Hungary, Debrecen, Nagyerdő, 47°34'47"N 21°37'36"E, h=500m, oak forest, cheese trap in mole ( <i>Talpa</i> ) nest, 19.vii.2006, Leg. Gy.Makranczy                                                                                                                |
| 10002554 | <i>Atheta dadopora</i> (Thomson, 1867)        | U.S.A., Tennessee, Sevier Co., 9.5 km NEE Gatlinburg, Great Smoky Mountains National Park, Greenbrier, nr. entrance, 35°44.265'N 83°24.976'W ±6m, h=455m, in hay [2447] [Garmin eTrex; WGS84], 30.vi.2006, Leg. V.I.Gusarov                                      |
| 10002578 | <i>Atheta gagatina</i> (Baudi di Selve, 1848) | Norway, env. of Oslo, 2 km SE Skullerud, 59°50.983'N 10°51.263'E ±9m, h=180m, on fungi [2179] [Garmin eTrex; WGS84], 28.viii.2005, Leg. V.I.Gusarov                                                                                                              |
| 10002580 | <i>Atheta gagatina</i> (Baudi di Selve, 1848) | Norway, env. of Oslo, 2 km SE Skullerud, 59°50.983'N 10°51.263'E ±9m, h=180m, on fungi [2179] [Garmin eTrex; WGS84], 28.viii.2005, Leg. V.I.Gusarov                                                                                                              |
| 10002561 | <i>Atheta graminicola</i> (Gravenhorst, 1806) | Norway, Akershus, Rælingen, Årnestangen, E bank of the river, 59°53.177'N 11°08.197'E ±8m, h=100m, flood refuse [2356] [Garmin eTrex; WGS84], 7.vi.2006, Leg. V.I.Gusarov                                                                                        |
| 10002562 | <i>Atheta graminicola</i> (Gravenhorst, 1806) | Norway, Akershus, Rælingen, Årnestangen, E bank of the river, 59°53.177'N 11°08.197'E ±8m, h=100m, flood refuse [2356] [Garmin eTrex; WGS84], 7.vi.2006, Leg. V.I.Gusarov                                                                                        |
| 10002586 | <i>Atheta kenyamontis</i> Pace, 1986          | Kenya, Central Prov., Mt.Kenya Nat. Park, Naro Moru route above meteorostation, 0°10'04.4"S 37°15'03.8"E ±10m, h=3896m, alpine vegetation belt, in rotting leaves of <i>Cirsium</i> -like plant [2668] [Garmin eTrex; WGS84], 8.xi.2006, Leg. V.I.Gusarov        |
| 10029115 | <i>Atheta laticeps</i> (Thomson, 1856)        | Belarus, Grodno reg., Shchuchin distr., 5 km NNW Zachepichi, Neman Riv., 53°29'20"N 24°57'52"E ±2000m, riverine oak forest [Garmin eTrex; WGS84], 28.ix.2006, Leg. A.Derunkov                                                                                    |
| 10029116 | <i>Atheta laticeps</i> (Thomson, 1856)        | Belarus, Grodno reg., Shchuchin distr., 5 km NNW Zachepichi, Neman Riv., 53°29'20"N 24°57'52"E ±2000m, riverine oak forest [Garmin eTrex; WGS84], 28.ix.2006, Leg. A.Derunkov                                                                                    |
| 10002606 | <i>Atheta laticollis</i> (Stephens, 1832)     | Norway, Akershus, Rælingen, Årnestangen, E bank of the river, 59°53.279'N 11°08.062'E ±7m, h=100m, flood refuse on previously flooded field [2357] [Garmin eTrex; WGS84], 7.vi.2006, Leg. V.I.Gusarov                                                            |
| 10002653 | <i>Atheta membranata</i> G.Benick, 1974       | France, Pyrénées-Orientales, Mosset–col de Jau, h=1450m, 19.viii.2007, Leg. M.Tronquet                                                                                                                                                                           |
| 10002621 | <i>Atheta modesta</i> (Melsheimer, 1844)      | U.S.A., North Carolina, Swain Co., 11–13 km NNW Cherokee, Great Smoky Mountains National Park, Thomas Ridge, Thomas Divide Trail, 35°34.581'–33.995'N 83°23.650'–22.881'W ±5m, h=1530–1590m, in fungi [2470] [Garmin eTrex; WGS84], 4.vii.2006, Leg. V.I.Gusarov |
| 10002620 | <i>Atheta modesta</i> (Melsheimer, 1844)      | U.S.A., North Carolina, Swain Co., 11–13 km NNW Cherokee, Great Smoky Mountains National Park, Thomas Ridge, Thomas Divide Trail, 35°34.581'–33.995'N 83°23.650'–22.881'W ±5m, h=1530–1590m, in fungi [2470] [Garmin eTrex; WGS84], 4.vii.2006, Leg. V.I.Gusarov |
| 10002642 | <i>Atheta pasadenae</i> Bernhauer, 1906       | France, Pyrénées-Orientales, Mosset–col de Jau, h=1450m, 19.viii.2007, Leg. M.Tronquet                                                                                                                                                                           |

|          |                                                |                                                                                                                                                                                                                                                                                             |
|----------|------------------------------------------------|---------------------------------------------------------------------------------------------------------------------------------------------------------------------------------------------------------------------------------------------------------------------------------------------|
| 10002548 | <i>Atheta ravilla</i> (Erichson, 1839)         | Norway, Sør-Trøndelag, Røros kommune, 31 km SE Røros, 3 km NEE Langen, Rundtjønnna Lake, NW bank, 62°26.784'N 11°54.583'E ±8m, h=659m, in fungi [2173] [Garmin eTrex; WGS84], 15.viii.2005, Leg. V.I.Gusarov                                                                                |
| 10002557 | <i>Atheta ravilla</i> (Erichson, 1839)         | Norway, env. of Oslo, 2 km SE Skullerud, 59°50.983'N 10°51.263'E ±9m, h=180m, on fungi [2179] [Garmin eTrex; WGS84], 28.viii.2005, Leg. V.I.Gusarov                                                                                                                                         |
| 10030796 | <i>Atheta scapularis</i> (C.R.Sahlberg, 1831)  | France, Pyrénées-Orientales, forêt de Rabouillet-Boucheville, h=800–1100m, filet de voiture, 6.v.2008, Leg. M.Tronquet                                                                                                                                                                      |
| 10030807 | <i>Atheta scapularis</i> (C.R.Sahlberg, 1831)  | France, Pyrénées-Orientales, forêt de Rabouillet-Boucheville, h=800–1100m, filet de voiture, 6.v.2008, Leg. M.Tronquet                                                                                                                                                                      |
| 10002639 | <i>Atheta setigera</i> (Sharp, 1869)           | Romania, jud. Hunedoara, Parcul National Retezat, Bordu Tomii, 0.5 km S Casc. Pietrele, 45°22'59"N 22°52'39"E, h=1840m, in horse dung on path on large rocks [239], 15.vii.2006, Leg. Gy.Makranczy                                                                                          |
| 10002564 | <i>Atheta</i> sp. ex gr. <i>lippa</i>          | U.S.A., Washington, Clallam Co., 5 km S Port Angeles, Olympic Nat. Park, Hurricane Ridge Rd., 48°04.389'N 123°25.986'W ±7m, h=370m, in forest litter, <i>Acer</i> , <i>Tuja</i> , ferns [2159] [Garmin eTrex; WGS84], 8.vii.2005, Leg. V.I.Gusarov                                          |
| 10002655 | <i>Atheta vaga</i> (Heer, 1839)                | France, Pyrénées-Orientales, Mosset–col de Jau, h=1450m, 19.viii.2007, Leg. M.Tronquet                                                                                                                                                                                                      |
| 10002613 | <i>Atheta vestita</i> (Gravenhorst, 1806)      | Norway, NSY; Gildeskål: Sund, (UTM) 33W 04586,74401, h=0m, rotting kelp in bottom of sandy bay [WGS84], 18.vii.2006, Leg. H.Elven                                                                                                                                                           |
| 10029114 | <i>Atheta vilis</i> (Erichson, 1837)           | Belarus, Grodno reg., Shchuchin distr., 5 km NNW Zachepichi, Neman Riv., 53°29'20"N 24°57'52"E ±2000m, riverine oak forest [Garmin eTrex; WGS84], 28.ix.2006, Leg. A.Derunkov                                                                                                               |
| 10002666 | <i>Atheta vilis</i> (Erichson, 1837)           | Belarus, Grodno reg., Shchuchin distr., 5 km NNW Zachepichi, Neman Riv., 53°29'20"N 24°57'52"E ±2000m, riverine oak forest [Garmin eTrex; WGS84], 28.ix.2006, Leg. A.Derunkov                                                                                                               |
| 10002596 | <i>Bolitochara pulchra</i> (Gravenhorst, 1806) | Norway, Sør-Trøndelag, Røros kommune, 31 km SE Røros, 3 km NEE Langen, Rundtjønnna Lake, NW bank, 62°26.784'N 11°54.583'E ±8m, h=659m, in fungi [2173] [Garmin eTrex; WGS84], 15.viii.2005, Leg. V.I.Gusarov                                                                                |
| 10002591 | <i>Bolitochara pulchra</i> (Gravenhorst, 1806) | Norway, Sør-Trøndelag, Røros kommune, 31 km SE Røros, 3 km NEE Langen, Rundtjønnna Lake, NW bank, 62°26.784'N 11°54.583'E ±8m, h=659m, in fungi [2173] [Garmin eTrex; WGS84], 15.viii.2005, Leg. V.I.Gusarov                                                                                |
| 10002634 | <i>Boreophilia hyperborea</i> (Brundin, 1940)  | Russia, Magadan Reg., Severo-Evenskiy Distr., env. of Evensk, 61°57'N 159°14'E, low hills surrounded by tussock ( <i>Carex</i> , <i>Eriophorum</i> ) tundra; in leaf litter: <i>Alnus</i> , <i>Betula nana</i> , <i>Salix</i> , <i>Pinus pumila</i> , moss, 27.vii.2007, Leg. A.S.Ryabukhin |

|           |                                                     |                                                                                                                                                                                                                                                                                            |
|-----------|-----------------------------------------------------|--------------------------------------------------------------------------------------------------------------------------------------------------------------------------------------------------------------------------------------------------------------------------------------------|
| 10002633  | <i>Boreostiba</i> sp.                               | Russia, Magadan Reg., Severo-Evenskiy Distr., env. of Evensk, 61°57'N 159°14'E, low hills surrounded by tussock ( <i>Carex</i> , <i>Eriophorum</i> ) tundra; in leaf litter: <i>Alnus</i> , <i>Betula nana</i> , <i>Salix</i> , <i>Pinus pumila</i> , moss, 28.vi.2007, Leg. A.S.Ryabukhin |
| 10002667  | <i>Brundinia meridionalis</i> (Mulsant & Rey, 1853) | Ukraine, Odessa reg., env. of Odessa, Svitle (Svetloye), ultra-violet light 250W, 26.vii.2008, Leg. A.Gontarenko                                                                                                                                                                           |
| 10030905  | <i>Callicerus obscurus</i> Gravenhorst, 1802        | Denmark, Fyn: nr Ørbæk, Lykkesholm Vandmolle, 55°14'297"N 10°37'328"E ±180m, h=50m, forest at rim of lake, sifted litter, moss & debris, 27.iii.2009, Leg. A.Schomann & J.Pedersen                                                                                                         |
| 10030800  | <i>Callicerus obscurus</i> Gravenhorst, 1802        | Denmark, Fyn: nr Ørbæk, Lykkesholm Vandmolle, 55°14'297"N 10°37'328"E ±180m, h=50m, forest at rim of lake, sifted litter, moss & debris, 27.iii.2009, Leg. A.Schomann & J.Pedersen                                                                                                         |
| 10002651  | <i>Cordalia obscura</i> (Gravenhorst, 1802)         | Greece, Corfu, env. of Agios Georgios, 39°26.070'N 19°57.263'E ±5m, h=24m, pile of hay in olive grove [2934] [Garmin 60CSx; WGS84], 26.vii.2007, Leg. V.I.Gusarov                                                                                                                          |
| 10002630  | <i>Dadobia immersa</i> (Erichson, 1837)             | Norway, AK, Oslo: Bygdøy, Huk, (UTM) 32V 0593398,6641668 ±12m, under bark on dead fir [WGS84], 13.ix.2006, Leg. H.Elven & V.I.Gusarov                                                                                                                                                      |
| 10002643  | <i>Dalotia coriaria</i> (Kraatz, 1856)              | France, Pyrénées-Orientales, Molitg-les-Bains, 42°39'N 2°23'E, 21.vii.2007, Leg. M.Tronquet                                                                                                                                                                                                |
| 10029112  | <i>Discerota torrentum</i> (Kiesenwetter,1850)      | France, Ariège, Aulus-les-Bains, h=1000m, sprinkled mosses, 8.vi.2009, Leg. M.Tronquet                                                                                                                                                                                                     |
| 10029113  | <i>Discerota torrentum</i> (Kiesenwetter,1850)      | France, Ariège, Aulus-les-Bains, h=1000m, sprinkled mosses, 8.vi.2009, Leg. M.Tronquet                                                                                                                                                                                                     |
| 10002604  | <i>Drusilla canaliculata</i> (Fabricius, 1787)      | Norway, Akershus, Rælingen, Årnestangen, E bank of the river, 59°53.177'N 11°08.197'E ±8m, h=100m, flood refuse [2356] [Garmin eTrex; WGS84], 7.vi.2006, Leg. V.I.Gusarov                                                                                                                  |
| 10002601  | <i>Drusilla canaliculata</i> (Fabricius, 1787)      | Norway, Akershus, Rælingen, Årnestangen, E bank of the river, 59°53.279'N 11°08.062'E ±7m, h=100m, flood refuse on previously flooded field [2357] [Garmin eTrex; WGS84], 7.vi.2006, Leg. V.I.Gusarov                                                                                      |
| 10051252  | <i>Drusilla</i> sp. 1                               | Thailand, Phetchabun, Khao Kho NP, 16°32.546'N 101°2.501'E, h=560m, mixed deciduous forest, Malaise trap [T1180], 5–12.xii.2006, Leg. Somchai Chachumnan & Saink Singtong                                                                                                                  |
| 10051251  | <i>Drusilla</i> sp. 1                               | Thailand, Phetchabun, Khao Kho NP, 16°32.546'N 101°2.501'E, h=560m, mixed deciduous forest, Malaise trap [T1180], 5–12.xii.2006, Leg. Somchai Chachumnan & Saink Singtong                                                                                                                  |
| 10051193* | <i>Drusilla</i> sp. 2                               | Laos, Champasak prov.: Bolaven plateau, Muang Paxong, Ban Thongvay, 15°14.741'N 106°31.916'E, h=1300m, disturbed primary rainforest; flight intercept trap [LAO08-5a], 9–16.vi.2008, Leg. A.Solodovnikov & J.Pedersen                                                                      |
| 10051194* | <i>Drusilla</i> sp. 2                               | Laos, Champasak prov.: Bolaven plateau, Muang Paxong, Ban Thongvay, 15°14.741'N 106°31.916'E, h=1300m, disturbed primary rainforest; flight intercept trap [LAO08-5a], 9–16.vi.2008, Leg. A.Solodovnikov & J.Pedersen                                                                      |

|           |                                                       |                                                                                                                                                                                                                                                                                                            |
|-----------|-------------------------------------------------------|------------------------------------------------------------------------------------------------------------------------------------------------------------------------------------------------------------------------------------------------------------------------------------------------------------|
| 10051166* | <i>Drusilla</i> sp. prope <i>khamhengi</i> Pace, 1984 | Laos, Vientiane prov., Houayang Nat. Park, 18°05.889'N 102°40.521'E, h=180m, mostly secondary rainforest, pitfall traps [LAO08-2f], 3–19.vi.2008, Leg. A.Solodovnikov & J.Pedersen                                                                                                                         |
| 10051165* | <i>Drusilla</i> sp. prope <i>khamhengi</i> Pace, 1984 | Laos, Vientiane prov., Houayang Nat. Park, 18°05.889'N 102°40.521'E, h=180m, mostly secondary rainforest, pitfall traps [LAO08-2f], 3–19.vi.2008, Leg. A.Solodovnikov & J.Pedersen                                                                                                                         |
| 10002539  | <i>Earota dentata</i> (Bernhauer, 1906)               | U.S.A., Tennessee, Sevier Co., 11.5 km E Gatlinburg, Great Smoky Mountains National Park, Greenbrier, pavilion, 35°42.219'N 83°23.165'W ±9m, h=575m, light trap [2419] [Garmin eTrex; WGS84], 24.vi.2006, Leg. V.I.Gusarov                                                                                 |
| 10029306  | <i>Earota reyi</i> (Kiesenwetter, 1850)               | France, Pyrénées-Orientales, forêt de Rabouillet-Boucheville, h=800–1100m, filet de voiture, 6.v.2008, Leg. M.Tronquet                                                                                                                                                                                     |
| 10029307  | <i>Earota reyi</i> (Kiesenwetter, 1850)               | France, Pyrénées-Orientales, forêt de Rabouillet-Boucheville, h=800–1100m, filet de voiture, 6.v.2008, Leg. M.Tronquet                                                                                                                                                                                     |
| 10029249  | <i>Ecitodonia</i> sp.                                 | Ecuador, Orellana, Yasuni Research Station, recently abandoned <i>Eciton burchelli</i> bivouac site, 13.vii.2008, Leg. A.K.Tishechkin                                                                                                                                                                      |
| 10029248  | <i>Ecitodonia</i> sp.                                 | Ecuador, Orellana, Yasuni Research Station, recently abandoned <i>Eciton burchelli</i> bivouac site, 13.vii.2008, Leg. A.K.Tishechkin                                                                                                                                                                      |
| 10002689  | <i>Ecitomorpha</i> sp.                                | Peru, Junín, 11 km NE Puerto Ocopa, Los Olivos, 11°3.00'S 74°15.52'W, h=1200m, Emigr. Column of <i>Eciton</i> , colony EP-01, AT1080, 27.iii.2009, Leg. A.K.Tishechkin                                                                                                                                     |
| 10002592  | <i>Ecitophya gracillima</i> Mann, 1925                | Peru, Loreto, 1 km E Jenaro Herrero, IIAP Centro de Investigaciones Jenaro Herrera, 4°53'36.4"S 73°39'01.6"W ±19m, h=103m, with army ants <i>Eciton hamatum</i> (F.) [2593] [Garmin eTrex; WGS84], 26.ix.2006, Leg. V.I.Gusarov                                                                            |
| 10029164  | <i>Ecitophya gracillima</i> Mann, 1925                | Peru, Loreto, 1 km E Jenaro Herrero, IIAP Centro de Investigaciones Jenaro Herrera, 4°53'36.4"S 73°39'01.6"W ±19m, h=103m, with army ants <i>Eciton hamatum</i> (F.) [2593] [Garmin eTrex; WGS84], 26.ix.2006, Leg. V.I.Gusarov                                                                            |
| 10029251  | <i>Ecitopora</i> sp.                                  | Ecuador, Orellana, Yasuni Research Station, recently abandoned <i>Eciton burchelli</i> bivouac site, 13.vii.2008, Leg. A.K.Tishechkin                                                                                                                                                                      |
| 10030875  | <i>Geostiba bicarinata</i> Lohse & Smetana, 1988      | U.S.A., North Carolina, Haywood Co./ Jackson Co., 14 km S Waynesville, Blue Ridge Parkway, Richland Balsam, S slope, 35°21.590'N 82°59.212'W ±9m, h=1840m, in forest litter, <i>Picea</i> , <i>Betula</i> , ferns, <i>Oxalis</i> , <i>Rubus</i> [2479] [Garmin eTrex; WGS84], 5.vii.2006, Leg. V.I.Gusarov |
| 10030948  | <i>Geostiba bicarinata</i> Lohse & Smetana, 1988      | U.S.A., North Carolina, Haywood Co./ Jackson Co., 14 km S Waynesville, Blue Ridge Parkway, Richland Balsam, S slope, 35°21.590'N 82°59.212'W ±9m, h=1840m, in forest litter, <i>Picea</i> , <i>Betula</i> , ferns, <i>Oxalis</i> , <i>Rubus</i> [2479] [Garmin eTrex; WGS84], 5.vii.2006, Leg. V.I.Gusarov |

|          |                                                    |                                                                                                                                                                                                                                                                                                            |
|----------|----------------------------------------------------|------------------------------------------------------------------------------------------------------------------------------------------------------------------------------------------------------------------------------------------------------------------------------------------------------------|
| 10002587 | <i>Geostiba circellaris</i> (Gravenhorst, 1806)    | Norway, env. of Oslo, 2 km SE Skullerud, 59°50.983'N 10°51.263'E ±9m, h=180m, in forest litter, <i>Picea</i> , <i>Vaccinium myrt.</i> , <i>Pinus</i> , <i>Betula</i> [2180] [Garmin eTrex; WGS84], 28.viii.2005, Leg. V.I.Gusarov                                                                          |
| 10030888 | <i>Geostiba nubigena</i> Lohse & Smetana, 1988     | U.S.A., North Carolina, Haywood Co./ Jackson Co., 14 km S Waynesville, Blue Ridge Parkway, Richland Balsam, S slope, 35°21.590'N 82°59.212'W ±9m, h=1840m, in forest litter, <i>Picea</i> , <i>Betula</i> , ferns, <i>Oxalis</i> , <i>Rubus</i> [2479] [Garmin eTrex; WGS84], 5.vii.2006, Leg. V.I.Gusarov |
| 10030736 | <i>Geostiba nubigena</i> Lohse & Smetana, 1988     | U.S.A., North Carolina, Haywood Co./ Jackson Co., 14 km S Waynesville, Blue Ridge Parkway, Richland Balsam, S slope, 35°21.590'N 82°59.212'W ±9m, h=1840m, in forest litter, <i>Picea</i> , <i>Betula</i> , ferns, <i>Oxalis</i> , <i>Rubus</i> [2479] [Garmin eTrex; WGS84], 5.vii.2006, Leg. V.I.Gusarov |
| 10002641 | <i>Gymnusa variegata</i> Kiesenwetter, 1845        | Romania, jud. Harghita, 4 km ESE Băile Tușnad, N edge of Tinovul Mohoș, slope/bank of stream Roșu, 46°08'15"N 25°54'27"E, h=1050m, muddy treaded grass on streamlet bank, flotation [206], 11.vi.2006, Leg. Gy.Makranczy                                                                                   |
| 10002584 | <i>Gyrophana congrua</i> Erichson, 1837            | Norway, env. of Oslo, W bank of Sognsvann Lake, 59°58'19"N 10°43'22"E ±8m, h=200m, in mushrooms ( <i>Kuehneromyces mutabilis</i> ) [2171] [Google Earth; WGS84], 7.viii.2005, Leg. V.I.Gusarov                                                                                                             |
| 10002585 | <i>Gyrophana fasciata</i> (Marsham, 1802)          | Norway, env. of Oslo, W bank of Sognsvann Lake, 59°58'19"N 10°43'22"E ±8m, h=200m, in mushrooms ( <i>Kuehneromyces mutabilis</i> ) [2171] [Google Earth; WGS84], 7.viii.2005, Leg. V.I.Gusarov                                                                                                             |
| 10002572 | <i>Gyrophana fasciata</i> (Marsham, 1802)          | Norway, env. of Oslo, W bank of Sognsvann Lake, 59°58'19"N 10°43'22"E ±8m, h=200m, in mushrooms ( <i>Kuehneromyces mutabilis</i> ) [2171] [Google Earth; WGS84], 7.viii.2005, Leg. V.I.Gusarov                                                                                                             |
| 10002647 | <i>Halobrecta cf. halensis</i> Mulsant & Rey, 1873 | Greece, Ionian Islands, Is. Lefkada, Lefkadha (Lefkada) City, S coast of enclosed bay N of the city, 38°50.153'N 20°42.556'E ±5m, h=0m, in seaweed pile on beach [2544] [Garmin eTrex; WGS84], 7.vii.2006, Leg. V.I.Gusarov                                                                                |
| 10002550 | <i>Hoplandria lateralis</i> (Melsheimer, 1846)     | U.S.A., Tennessee, Sevier Co., 11.5 km E Gatlinburg, Great Smoky Mountains National Park, Greenbrier, pavilion, 35°42.219'N 83°23.165'W ±9m, h=575m, light trap [2419] [Garmin eTrex; WGS84], 24.vi.2006, Leg. V.I.Gusarov                                                                                 |
| 10002661 | <i>Hydrosmecta eximia</i> (Sharp, 1869)            | Austria, Oberösterreich, Bezirk Kirchdorf an der Krems, 1 km N Molln, Gstadt, Krumme Steyrling, 47°53.676'N 14°15.351'E ±6m, h=383m, flooding river banks, stones, gravel, sand [3312] [Garmin 60CSx; WGS84], 6.v.2008, Leg. V.I.Gusarov & H.Elven                                                         |
| 10002659 | <i>Hydrosmecta eximia</i> (Sharp, 1869)            | Austria, Oberösterreich, Bezirk Kirchdorf an der Krems, 1 km N Molln, Gstadt, Krumme Steyrling, 47°53.676'N 14°15.351'E ±6m, h=383m, flooding river banks, stones, gravel, sand                                                                                                                            |



|          |                                                         |                                                                                                                                                                                                                                                                                             |
|----------|---------------------------------------------------------|---------------------------------------------------------------------------------------------------------------------------------------------------------------------------------------------------------------------------------------------------------------------------------------------|
|          |                                                         | [3312] [Garmin 60CSx; WGS84], 6.v.2008, Leg. V.I.Gusarov & H.Elven                                                                                                                                                                                                                          |
| 10002658 | <i>Hydrosmeeta gracilicornis</i> (Erichson, 1839)       | Austria, Oberösterreich, Bezirk Kirchdorf an der Krems, 1 km N Molln, Gstadt, Krumme Steyrling, 47°53.676'N 14°15.351'E ±6m, h=383m, flooding river banks, stones, gravel, sand [3312] [Garmin 60CSx; WGS84], 6.v.2008, Leg. V.I.Gusarov & H.Elven                                          |
| 10002650 | <i>Hydrosmeeta</i> sp. 1                                | U.S.A., Oregon, Curry Co., 23 km SE Port Orford, NFD 3402, Euchre Creek, 42°35.142'N 124°19.716'W ±8m, h=20m, creek banks, fine gravel [2139] [Garmin eTrex; WGS84], 6.vii.2005, Leg. V.I.Gusarov                                                                                           |
| 10002660 | <i>Hydrosmeeta</i> sp. 2                                | Austria, Oberösterreich, Bezirk Kirchdorf an der Krems, 1 km N Molln, Gstadt, Krumme Steyrling, 47°53.676'N 14°15.351'E ±6m, h=383m, flooding river banks, stones, gravel, sand [3312] [Garmin 60CSx; WGS84], 6.v.2008, Leg. V.I.Gusarov & H.Elven                                          |
| 10002662 | <i>Hydrosmeeta valdieriana</i> (Scheerpeltz, 1944)      | Austria, Oberösterreich, Bezirk Kirchdorf an der Krems, 1 km N Molln, Gstadt, Krumme Steyrling, 47°53.676'N 14°15.351'E ±6m, h=383m, flooding river banks, stones, gravel, sand [3312] [Garmin 60CSx; WGS84], 6.v.2008, Leg. V.I.Gusarov & H.Elven                                          |
| 10002663 | <i>Hydrosmeeta valdieriana</i> (Scheerpeltz, 1944)      | Austria, Oberösterreich, Bezirk Kirchdorf an der Krems, 1 km N Molln, Gstadt, Krumme Steyrling, 47°53.676'N 14°15.351'E ±6m, h=383m, flooding river banks, stones, gravel, sand [3312] [Garmin 60CSx; WGS84], 6.v.2008, Leg. V.I.Gusarov & H.Elven                                          |
| 10002600 | <i>Liogluta microptera</i> Thomson, 1867                | Czech Republic, Jihočeský Region, 50 km SWW České Budějovice, Šumava National Park, 48°51.552'N 13°49.104'E ±5m, h=780m, right bank of the river, in flood refuse [2348] [Garmin eTrex; WGS84], 28.v.2006, Leg. V.I.Gusarov                                                                 |
| 10002602 | <i>Liogluta microptera</i> Thomson, 1867                | Czech Republic, Jihočeský Region, 50 km SWW České Budějovice, Šumava National Park, 48°51.552'N 13°49.104'E ±5m, h=780m, right bank of the river, in flood refuse [2348] [Garmin eTrex; WGS84], 28.v.2006, Leg. V.I.Gusarov                                                                 |
| 10002636 | <i>Liogluta nigropolita</i> (Bernhauer, 1907)           | Russia, Magadan Reg., Severo-Evenskiy Distr., env. of Evensk, 61°57'N 159°14'E, low hills surrounded by tussock ( <i>Carex</i> , <i>Eriophorum</i> ) tundra; in leaf litter: <i>Alnus</i> , <i>Betula nana</i> , <i>Salix</i> , <i>Pinus pumila</i> , moss, 27.vii.2007, Leg. A.S.Ryabukhin |
| 10030941 | <i>Lomechusa emarginata</i> (Paykull, 1789)             | Norway, EIS 28 AK, ASKER: Brønnøya, Store Ostsundet, (UTM) NM 87013,37111 ±8m, h=10m, <i>Myrmica</i> nest under stone. SE faced slope, clay stone [HE09-12D] [WGS84], 15.v.2009, Leg. H.Elven                                                                                               |
| 10030947 | <i>Lomechusa emarginata</i> (Paykull, 1789)             | Norway, EIS 28 AK, ASKER: Brønnøya, Store Ostsundet, (UTM) NM 87009,37108 ±6m, h=10m, <i>Myrmica</i> nest under stone. SE faced slope, clay stone [HE09-12C] [WGS84], 15.v.2009, Leg. H.Elven                                                                                               |
| 10030917 | <i>Lomechusa pubicollis</i> Brisout de Barneville, 1860 | Germany, Mark Brandenburg, Müncheberg, 52°32.016'N 14°01.665'E ±5m (extent=5m), h=44m,                                                                                                                                                                                                      |

|          |                                                |                                                                                                                                                                                                                                                                                            |
|----------|------------------------------------------------|--------------------------------------------------------------------------------------------------------------------------------------------------------------------------------------------------------------------------------------------------------------------------------------------|
|          |                                                | in <i>Formica</i> nest (hill) [3750] [Garmin 60CSx; WGS84], 23.v.2009, Leg. V.I.Gusarov                                                                                                                                                                                                    |
| 10029159 | Lomechusini genus 1                            | Ecuador, Orellana, Yasuni Research Station, recently abandoned <i>Eciton burchelli</i> bivouac site, 13.vii.2008, Leg. A.K.Tishechkin                                                                                                                                                      |
| 10002685 | Lomechusini genus 2                            | Ecuador, Orellana, Yasuni Research Station, recently abandoned <i>Eciton burchelli</i> bivouac site, 13.vii.2008, Leg. A.K.Tishechkin                                                                                                                                                      |
| 10029161 | Lomechusini genus 2                            | Ecuador, Orellana, Yasuni Research Station, recently abandoned <i>Eciton burchelli</i> bivouac site, 13.vii.2008, Leg. A.K.Tishechkin                                                                                                                                                      |
| 10029252 | Lomechusini genus 3                            | Ecuador, Orellana, Yasuni Research Station, recently abandoned <i>Eciton burchelli</i> bivouac site, 13.vii.2008, Leg. A.K.Tishechkin                                                                                                                                                      |
| 10029253 | Lomechusini genus 3                            | Ecuador, Orellana, Yasuni Research Station, recently abandoned <i>Eciton burchelli</i> bivouac site, 13.vii.2008, Leg. A.K.Tishechkin                                                                                                                                                      |
| 10029256 | Lomechusini genus 4                            | Ecuador, Orellana, Yasuni Research Station, recently abandoned <i>Eciton burchelli</i> bivouac site, 13.vii.2008, Leg. A.K.Tishechkin                                                                                                                                                      |
| 10029254 | Lomechusini genus 4                            | Ecuador, Orellana, Yasuni Research Station, recently abandoned <i>Eciton burchelli</i> bivouac site, 13.vii.2008, Leg. A.K.Tishechkin                                                                                                                                                      |
| 10029258 | Lomechusini genus 5                            | Ecuador, Orellana, Yasuni Research Station, recently abandoned <i>Eciton burchelli</i> bivouac site, 13.vii.2008, Leg. A.K.Tishechkin                                                                                                                                                      |
| 10029257 | Lomechusini genus 5                            | Ecuador, Orellana, Yasuni Research Station, recently abandoned <i>Eciton burchelli</i> bivouac site, 13.vii.2008, Leg. A.K.Tishechkin                                                                                                                                                      |
| 10029279 | Lomechusini genus 6                            | Ecuador, Orellana, Yasuni Research Station, recently abandoned <i>Eciton burchelli</i> bivouac site, 13.vii.2008, Leg. A.K.Tishechkin                                                                                                                                                      |
| 10029280 | Lomechusini genus 7                            | Ecuador, Orellana, Yasuni Research Station, recently abandoned <i>Eciton burchelli</i> bivouac site, 13.vii.2008, Leg. A.K.Tishechkin                                                                                                                                                      |
| 10029282 | Lomechusini genus 7                            | Ecuador, Orellana, Yasuni Research Station, recently abandoned <i>Eciton burchelli</i> bivouac site, 13.vii.2008, Leg. A.K.Tishechkin                                                                                                                                                      |
| 10030868 | <i>Lomechusoides amurensis</i> (Wasmann, 1897) | Russia, Irkutsk Reg., Irkutsk, right bank of the Irkut River, crumbly stump with ants, 28.iv.2009, Leg. I.Enustschenko                                                                                                                                                                     |
| 10002632 | <i>Lypoglossa lateralis</i> (Mannerheim, 1830) | Russia, Magadan Reg., Severo-Evenskiy Distr., env. of Evensk, 61°57'N 159°14'E, low hills surrounded by tussock ( <i>Carex</i> , <i>Eriophorum</i> ) tundra; in leaf litter: <i>Alnus</i> , <i>Betula nana</i> , <i>Salix</i> , <i>Pinus pumila</i> , moss, 28.vi.2007, Leg. A.S.Ryabukhin |
| 10002649 | <i>Lyprocorrhe anceps</i> (Erichson, 1837)     | Norway, AK, Oslo: Vettakollen, Båntjern, (UTM) 32V 05952,66487, on anthill ( <i>F. rufa</i> group) in                                                                                                                                                                                      |

|          |                                            |                                                                                                                                                                                                                                                                                                                                  |
|----------|--------------------------------------------|----------------------------------------------------------------------------------------------------------------------------------------------------------------------------------------------------------------------------------------------------------------------------------------------------------------------------------|
|          |                                            | mixed forest [WGS84], 4.v.2006, Leg. H.Elven                                                                                                                                                                                                                                                                                     |
| 10002576 | <i>Meronera venustula</i> (Erichson, 1839) | U.S.A., Kansas, Douglas Co., Lawrence, 38°59.59'N 95°14.59'W, h=200m, in flood refuse (mostly rotting old corn stems) [2050] [Garmin eTrex; WGS84], 19.vi.2005, Leg. V.I.Gusarov                                                                                                                                                 |
| 10002588 | <i>Mocyta fungi</i> (Gravenhorst, 1806)    | Germany, Brandenburg, "Märkische Schweiz", nature reserve "Großer Klobichsee" W Münchehofe, 52°33.526'N 14°07.584'E ±13m, h=30m, in leaf litter, <i>Quercus</i> , <i>Alnus</i> , <i>Galium</i> , <i>Glechoma</i> , <i>Cardamine</i> , <i>Primula</i> , <i>Corydalis</i> [2028] [Garmin eTrex; WGS84], 7.v.2005, Leg. V.I.Gusarov |
| 10002589 | <i>Mocyta fungi</i> (Gravenhorst, 1806)    | Germany, Brandenburg, "Märkische Schweiz", nature reserve "Großer Klobichsee" W Münchehofe, 52°33.526'N 14°07.584'E ±13m, h=30m, in leaf litter, <i>Quercus</i> , <i>Alnus</i> , <i>Galium</i> , <i>Glechoma</i> , <i>Cardamine</i> , <i>Primula</i> , <i>Corydalis</i> [2028] [Garmin eTrex; WGS84], 7.v.2005, Leg. V.I.Gusarov |
| 10002540 | <i>Mocyta scopula</i> (Casey, 1893)        | U.S.A., Kansas, Douglas Co., 18 km SSE Lawrence, Breidenthal Preserve, 38°48.589'N 95°11.409'W ±7m, h=260m, in forest litter, <i>Quercus</i> [2044] [Garmin eTrex; WGS84], 18.vi.2005, Leg. V.I.Gusarov                                                                                                                          |
| 10002559 | <i>Mocyta scopula</i> (Casey, 1893)        | U.S.A., Kansas, Douglas Co., 18 km SSE Lawrence, Breidenthal Preserve, 38°48.589'N 95°11.409'W ±7m, h=260m, in forest litter, <i>Quercus</i> [2044] [Garmin eTrex; WGS84], 18.vi.2005, Leg. V.I.Gusarov                                                                                                                          |
| 10030903 | <i>Myllaena audax</i> Casey, 1911          | U.S.A., Oregon, Coos Co., 6 km N Coos Bay, Oregon Dunes Nat. Rec. Area, Siuslaw Nat. Forest, 43°26.908'N 124°14.945'W ±7m, h=0m, lake banks, <i>Carex</i> , organic debris [2143] [Garmin eTrex; WGS84], 6.vii.2005, Leg. V.I.Gusarov                                                                                            |
| 10002598 | <i>Myllaena audax</i> Casey, 1911          | U.S.A., Oregon, Coos Co., 6 km N Coos Bay, Oregon Dunes Nat. Rec. Area, Siuslaw Nat. Forest, 43°26.908'N 124°14.945'W ±7m, h=0m, lake banks, <i>Carex</i> , organic debris [2143] [Garmin eTrex; WGS84], 6.vii.2005, Leg. V.I.Gusarov                                                                                            |
| 10030945 | <i>Myrmecopora uvida</i> (Erichson, 1840)  | Greece, Ionian Islands, Is. Lefkada, Lefkadha (Lefkada) City, S coast of enclosed bay N of the city, 38°50.153'N 20°42.556'E ±5m, h=0m, in seaweed pile on beach [2544] [Garmin eTrex; WGS84], 7.vii.2006, Leg. V.I.Gusarov                                                                                                      |
| 10029111 | <i>Myrmecopora uvida</i> (Erichson, 1840)  | Greece, Ionian Islands, Is. Lefkada, Lefkadha (Lefkada) City, S coast of enclosed bay N of the city, 38°50.153'N 20°42.556'E ±5m, h=0m, in seaweed pile on beach [2544] [Garmin eTrex; WGS84], 7.vii.2006, Leg. V.I.Gusarov                                                                                                      |
| 10002615 | <i>Myrmedonota</i> sp.                     | U.S.A., Tennessee, Sevier Co., 11 km SEE Gatlinburg, Great Smoky Mountains National Park, Porters Creek trail, 35°40.928'N 83°23.810'W ±11m, h=775m, on fermenting oak sap [2433] [Garmin eTrex; WGS84], 27.vi.2006, Leg. V.I.Gusarov                                                                                            |

|           |                                                          |                                                                                                                                                                                                                                                                                       |
|-----------|----------------------------------------------------------|---------------------------------------------------------------------------------------------------------------------------------------------------------------------------------------------------------------------------------------------------------------------------------------|
| 10002614  | <i>Myrmedonota</i> sp.                                   | U.S.A., Tennessee, Sevier Co., 11.5 km E Gatlinburg, Great Smoky Mountains National Park, Greenbrier, pavilion, 35°42.219'N 83°23.165'W ±9m, h=575m, light trap [2419] [Garmin eTrex; WGS84], 24.vi.2006, Leg. V.I.Gusarov                                                            |
| 10051237* | <i>Orphnebius</i> sp. 1                                  | Laos, Vientiane prov., Phou Khao Khouay, 18°20.369'N 102°48.523'E, h=700–800m, strongly disturbed primary rainforest, nr. forest edge, flight intercept trap [LAO08-1j], 26–31.v.2008, Leg. A.Solodovnikov & J.Pedersen                                                               |
| 10051236* | <i>Orphnebius</i> sp. 2                                  | Laos, Champasak prov., Bolaven plateau, Muang Paxong, Ban Thongvay, 15°14.054'N 106°31.867'E, h=1200m, edge of disturbed primary rainforest (nr. clearing), Malaise trap [LAO08-6b], 8–16.vi.2008, Leg. A.Solodovnikov & J.Pedersen                                                   |
| 10051239  | <i>Orphnebius</i> sp. 3                                  | Thailand, Phetchabun, Thung Salaeng Luang NP, Gang wang nam yen, 16°35.789'N 100°52.286'E, h=769m, Malaise trap, pine forest [T1291], 4–11.i.2007, Leg. Pongpitak & Sathit                                                                                                            |
| 10051238  | <i>Orphnebius</i> sp. 4                                  | Thailand, Phetchabun, Thung Salaeng Luang NP, Gang wang nam yen, 16°35.789'N 100°52.286'E, h=769m, Malaise trap, pine forest [T1291], 4–11.i.2007, Leg. Pongpitak & Sathit                                                                                                            |
| 10002637  | <i>Oxypoda praecox</i> Erichson, 1839                    | Germany, Brandenburg, “Märkische Schweiz”, nature reserve “Großer Klobichsee” W Münchehofe, 52°33.765'N 14°07.415'E ±13m, h=40m, in leaf litter, <i>Betula</i> , <i>Alnus</i> , <i>Carex</i> , <i>Urtica</i> , in wet hollow [2025] [Garmin eTrex; WGS84], 7.v.2005, Leg. V.I.Gusarov |
| 10051235  | <i>Pedinopleurus</i> sp.                                 | Thailand, Phetchabun, Khao Kho NP, 16°32.546'N 101°2.501'E, h=560m, mixed deciduous forest, Malaise trap [T1189], 26.xii.2006–2.i.2007, Leg. Somchai Chachumnan & Saink Singtong                                                                                                      |
| 10030959* | <i>Pelioptera</i> sp. prope <i>micans</i> (Kraatz, 1857) | Laos, Champasak prov.: Bolaven plateau, Muang Paxong, Ban Thongvay, 15°14.741'N 106°31.916'E, h=1300m, disturbed primary rainforest; flight intercept trap [LAO08-5a], 9–16.vi.2008, Leg. A.Solodovnikov & J.Pedersen                                                                 |
| 10002617  | <i>Pella caliginosa</i> (Casey, 1893)                    | U.S.A., Tennessee, Sevier Co., 11.5 km E Gatlinburg, Great Smoky Mountains National Park, Greenbrier, pavilion, 35°42.219'N 83°23.165'W ±9m, h=575m, light trap [2419] [Garmin eTrex; WGS84], 24.vi.2006, Leg. V.I.Gusarov                                                            |
| 10002616  | <i>Pella caliginosa</i> (Casey, 1893)                    | U.S.A., Tennessee, Sevier Co., 11.5 km E Gatlinburg, Great Smoky Mountains National Park, Greenbrier, pavilion, 35°42.219'N 83°23.165'W ±9m, h=575m, light trap [2419] [Garmin eTrex; WGS84], 24.vi.2006, Leg. V.I.Gusarov                                                            |
| 10002569  | <i>Pella humeralis</i> (Gravenhorst, 1802)               | Norway, env. of Oslo, 1.5 km SE Skullerud, 59°51.271'N 10°51.538'E ±10m, h=200m, in forest litter, <i>Picea</i> , <i>Betula</i> , <i>Populus tremula</i> [2030] [Garmin eTrex; WGS84], 15.v.2005, Leg. V.I.Gusarov                                                                    |
| 10002607  | <i>Philhygra debilis</i> (Erichson, 1837)                | Norway, Akershus, Rælingen, Årnestangen, E bank of the river, 59°53.177'N 11°08.197'E ±8m, h=100m, flood refuse [2356] [Garmin eTrex; WGS84], 7.vi.2006, Leg. V.I.Gusarov                                                                                                             |
| 10002608  | <i>Philhygra debilis</i> (Erichson, 1837)                | Norway, Akershus, Rælingen, Årnestangen, E bank of the river, 59°53.177'N 11°08.197'E ±8m,                                                                                                                                                                                            |

|          |                                                             |                                                                                                                                                                                                                                                                  |
|----------|-------------------------------------------------------------|------------------------------------------------------------------------------------------------------------------------------------------------------------------------------------------------------------------------------------------------------------------|
|          |                                                             | h=100m, flood refuse [2356] [Garmin eTrex; WGS84], 7.vi.2006, Leg. V.I.Gusarov                                                                                                                                                                                   |
| 10002610 | <i>Philhygra fallaciosa</i> (Sharp, 1869)                   | Czech Republic, Jihočeský Region, 50 km SWW České Budějovice, Šumava National Park, 48°51.552'N 13°49.104'E ±5m, h=780m, right bank of the river, in flood refuse [2348] [Garmin eTrex; WGS84], 28.v.2006, Leg. V.I.Gusarov                                      |
| 10002609 | <i>Philhygra fallaciosa</i> (Sharp, 1869)                   | Czech Republic, Jihočeský Region, 50 km SWW České Budějovice, Šumava National Park, 48°51.552'N 13°49.104'E ±5m, h=780m, right bank of the river, in flood refuse [2348] [Garmin eTrex; WGS84], 28.v.2006, Leg. V.I.Gusarov                                      |
| 10002595 | <i>Philhygra iterans</i> (Casey, 1910)                      | U.S.A., Tennessee, Sevier Co., 11.5 km E Gatlinburg, Great Smoky Mountains National Park, Greenbrier, pavilion, 35°42.219'N 83°23.165'W ±9m, h=575m, light trap [2419] [Garmin eTrex; WGS84], 24.vi.2006, Leg. V.I.Gusarov                                       |
| 10002594 | <i>Philhygra iterans</i> (Casey, 1910)                      | U.S.A., Tennessee, Sevier Co., 11.5 km E Gatlinburg, Great Smoky Mountains National Park, Greenbrier, pavilion, 35°42.219'N 83°23.165'W ±9m, h=575m, light trap [2419] [Garmin eTrex; WGS84], 24.vi.2006, Leg. V.I.Gusarov                                       |
| 10002541 | <i>Placusa</i> sp. <i>prope tachyporoides</i> (Waltl, 1838) | U.S.A., Tennessee, Sevier Co., 11 km SEE Gatlinburg, Great Smoky Mountains National Park, Porters Creek trail, 35°40.928'N 83°23.810'W ±11m, h=775m, on fermenting oak sap [2433] [Garmin eTrex; WGS84], 27.vi.2006, Leg. V.I.Gusarov                            |
| 10002577 | <i>Pontomalota opaca</i> (LeConte, 1863)                    | U.S.A., Washington, Jefferson Co., 3 km S Kalaloch, Olympic Nat. Park, 47°34.734'N 124°21.903'W ±8m, h=0m, ocean beach, on sand under seaweed [2145] [Garmin eTrex; WGS84], 7.vii.2005, Leg. V.I.Gusarov                                                         |
| 10002574 | <i>Pontomalota opaca</i> (LeConte, 1863)                    | U.S.A., Washington, Jefferson Co., 3 km S Kalaloch, Olympic Nat. Park, 47°34.734'N 124°21.903'W ±8m, h=0m, ocean beach, on sand under seaweed [2145] [Garmin eTrex; WGS84], 7.vii.2005, Leg. V.I.Gusarov                                                         |
| 10002625 | <i>Silusida marginella</i> (Casey, 1893)                    | U.S.A., North Carolina, Swain Co., 11–13 km NNW Cherokee, Great Smoky Mountains National Park, Thomas Ridge, Thomas Divide Trail, 35°34.581'–33.995'N 83°23.650'–22.881'W ±5m, h=1530–1590m, in fungi [2470] [Garmin eTrex; WGS84], 4.vii.2006, Leg. V.I.Gusarov |
| 10002624 | <i>Silusida marginella</i> (Casey, 1893)                    | U.S.A., North Carolina, Swain Co., 11–13 km NNW Cherokee, Great Smoky Mountains National Park, Thomas Ridge, Thomas Divide Trail, 35°34.581'–33.995'N 83°23.650'–22.881'W ±5m, h=1530–1590m, in fungi [2470] [Garmin eTrex; WGS84], 4.vii.2006, Leg. V.I.Gusarov |
| 10002567 | <i>Stethusa dichroa</i> (Gravenhorst, 1802)                 | U.S.A., Tennessee, Sevier Co., 11.5 km E Gatlinburg, Great Smoky Mountains National Park, Greenbrier, pavilion, 35°42.219'N 83°23.165'W ±9m, h=575m, light trap [2419] [Garmin eTrex; WGS84], 24.vi.2006, Leg. V.I.Gusarov                                       |
| 10002568 | <i>Stethusa dichroa</i> (Gravenhorst, 1802)                 | U.S.A., Tennessee, Sevier Co., 11.5 km E Gatlinburg, Great Smoky Mountains National Park,                                                                                                                                                                        |

|           |                                                        |                                                                                                                                                                                                                             |
|-----------|--------------------------------------------------------|-----------------------------------------------------------------------------------------------------------------------------------------------------------------------------------------------------------------------------|
|           |                                                        | Greenbrier, pavilion, 35°42.219'N 83°23.165'W ±9m, h=575m, light trap [2419] [Garmin eTrex; WGS84], 24.vi.2006, Leg. V.I.Gusarov                                                                                            |
| 10002599  | <i>Stethusa spuriella</i> (Casey, 1910)                | U.S.A., Tennessee, Sevier Co., 9.5 km NEE Gatlinburg, Great Smoky Mountains National Park, Greenbrier, nr. entrance, 35°44.265'N 83°24.976'W ±6m, h=455m, in hay [2447] [Garmin eTrex; WGS84], 30.vi.2006, Leg. V.I.Gusarov |
| 10002628  | <i>Stethusa spuriella</i> (Casey, 1910)                | U.S.A., Tennessee, Sevier Co., 9.5 km NEE Gatlinburg, Great Smoky Mountains National Park, Greenbrier, nr. entrance, 35°44.265'N 83°24.976'W ±6m, h=455m, in hay [2447] [Garmin eTrex; WGS84], 30.vi.2006, Leg. V.I.Gusarov |
| 10002571  | <i>Strigota ambigua</i> (Erichson, 1839)               | U.S.A., Kansas, Douglas Co., Lawrence, 38°59.59'N 95°14.59'W, h=200m, in flood refuse (mostly rotting old corn stems) [2050] [Garmin eTrex; WGS84], 19.vi.2005, Leg. V.I.Gusarov                                            |
| 10002575  | <i>Strigota ambigua</i> (Erichson, 1839)               | U.S.A., Kansas, Douglas Co., Lawrence, 38°59.075'N 95°14.608'W ±20m, h=200m, edge of flooded field, old corn stems and wet soil [2033] [Garmin eTrex; WGS84], 15.vi.2005, Leg. V.I.Gusarov                                  |
| 10002542  | <i>Tachinus proximus</i> Kraatz, 1855                  | Norway, Sør-Trøndelag, Røros kommune, 31 km SE Røros, 3 km NEE Langen, Rundtjønn Lake, W bank, 62°26.584–.489'N 11°54.464–640'E ±14m, h=680m, in fungi [2172] [Garmin eTrex; WGS84], 13.viii.2005, Leg. V.I.Gusarov         |
| 10002593  | <i>Tarphiota fucicola</i> (Mäklin in Mannerheim, 1852) | U.S.A., California, Sonoma Co., 21 km SWW Sebastopol, N shore of Bodega Bay, Doran County Park, 38°18.823'N 123°02.384'W ±5m, h=0m, under seaweeds and in sand [2107] [Garmin eTrex; WGS84], 2.vii.2005, Leg. V.I.Gusarov   |
| 10029163  | <i>Tetradonia</i> sp. 1                                | Ecuador, Orellana, Yasuni Research Station, <i>Eciton hamatum</i> emigration column, 22.vii.2008, Leg. A.K.Tishechkin                                                                                                       |
| 10029160  | <i>Tetradonia</i> sp. 2                                | Ecuador, Orellana, Yasuni Research Station, <i>Eciton hamatum</i> emigration column, 22.vii.2008, Leg. A.K.Tishechkin                                                                                                       |
| 10029285* | <i>Tetrasticta</i> sp. 1                               | Laos, Champasak prov.: Bolaven plateau, Muang Paxong, Ban Thongvay, 15°14.741'N 106°31.916'E, h=1300m, disturbed primary rainforest; flight intercept trap [LAO08-5a], 9–16.vi.2008, Leg. A.Solodovnikov & J.Pedersen       |
| 10029284* | <i>Tetrasticta</i> sp. 2                               | Laos, Champasak prov.: Bolaven plateau, Muang Paxong, Ban Thongvay, 15°14.741'N 106°31.916'E, h=1300m, disturbed primary rainforest; flight intercept trap [LAO08-5a], 9–16.vi.2008, Leg. A.Solodovnikov & J.Pedersen       |
| 10002612  | <i>Thendelecrotona</i> sp.                             | South Africa, Western Cape, env. of Cape Town, Table Mountain, 33°57.784'S 18°24.396'E ±6m, h=1020m, in <i>Protea</i> flowers [2332] [Garmin eTrex; WGS84], 6.iv.2006, Leg. V.I.Gusarov                                     |
| 10002669  | <i>Zyras collaris</i> (Paykull, 1800)                  | Abkhasia, left bank of Kodori Riv., nr Naa Village, 42°55'28.6"N E41°17'43.4"E, h=195m, forest                                                                                                                              |

with *Quercus iberica*, *Carpinus*, *Ruscus ponticus*, *Rhododendron ponticum*, in leaf litter [AB-31], 29.vii.2009, Leg. N.Yunakov

|           |                                                       |                                                                                                                                                                                                                         |
|-----------|-------------------------------------------------------|-------------------------------------------------------------------------------------------------------------------------------------------------------------------------------------------------------------------------|
| 10051274  | <i>Zyras perdecoratus</i> Pace, 2005                  | Thailand, Phetchabun, Khao Kho NP, 16°32.546'N 101°2.501'E, h=560m, mixed deciduous forest, Malaise trap [T1189], 26.xii.2006–2.i.2007, Leg. Somchai Chachumnan & Saink Singtong                                        |
| 10051273  | <i>Zyras perdecoratus</i> Pace, 2005                  | Thailand, Phetchabun, Khao Kho NP, 16°32.546'N 101°2.501'E, h=560m, mixed deciduous forest, Malaise trap [T1189], 26.xii.2006–2.i.2007, Leg. Somchai Chachumnan & Saink Singtong                                        |
| 10051276  | <i>Zyras</i> sp. prope <i>perdecoratus</i> Pace, 2005 | Thailand, Phetchabun, Khao Kho NP, 16°32.546'N 101°2.501'E, h=560m, mixed deciduous forest, Malaise trap [T1189], 26.xii.2006–2.i.2007, Leg. Somchai Chachumnan & Saink Singtong                                        |
| 10051275  | <i>Zyras</i> sp. prope <i>perdecoratus</i> Pace, 2005 | Thailand, Phetchabun, Khao Kho NP, 16°32.546'N 101°2.501'E, h=560m, mixed deciduous forest, Malaise trap [T1189], 26.xii.2006–2.i.2007, Leg. Somchai Chachumnan & Saink Singtong                                        |
| 10030963  | <i>Zyras</i> sp. 1                                    | Thailand, Sakon Nakhon, Phu Phan NP, behind forest protection unit at Huay Wien Prai, 17°6.81'N 104°0.318'E, h=318m, Malaise trap [T1690], 17–25.ii.2007, Leg. Sailom Tongboonchai                                      |
| 10030758  | <i>Zyras</i> sp. 1                                    | Thailand, Sakon Nakhon, Phu Phan NP, behind forest protection unit at Huay Wien Prai, 17°6.81'N 104°0.318'E, h=318m, Malaise trap [T1690], 17–25.ii.2007, Leg. Sailom Tongboonchai                                      |
| 10051233* | <i>Zyras</i> sp. 2                                    | Laos, Vientiane prov., Phou Khao Khouay, 18°20.369'N 102°48.523'E, h=700–800m, strongly disturbed primary rainforest, nr. forest edge, flight intercept trap [LAO08-1j], 26–31.v.2008, Leg. A.Solodovnikov & J.Pedersen |
| 10051234* | <i>Zyras</i> sp. 2                                    | Laos, Vientiane prov., Phou Khao Khouay, 18°20.369'N 102°48.523'E, h=700–800m, strongly disturbed primary rainforest, nr. forest edge, flight intercept trap [LAO08-1j], 26–31.v.2008, Leg. A.Solodovnikov & J.Pedersen |
| 10051280  | <i>Zyras</i> sp. 3                                    | Thailand, Phetchabun, Thung Salaeng Luang NP, Gang wang nam yen, 16°35.789'N 100°52.286'E, h=769m, Malaise trap, pine forest [T1291], 4–11.i.2007, Leg. Pongpitak & Sathit                                              |
| 10051279  | <i>Zyras</i> sp. 3                                    | Thailand, Phetchabun, Thung Salaeng Luang NP, Gang wang nam yen, 16°35.789'N 100°52.286'E, h=769m, Malaise trap, pine forest [T1291], 4–11.i.2007, Leg. Pongpitak & Sathit                                              |

---
