# Supplementary material for: Molecular phylogeny of the Athetini–Lomechusini–Ecitocharini clade of aleocharine rove beetles (Insecta)
Source: PubMed Central journal article supplement (PMC3532658; doi:10.1111/j.1463-6409.2012.00553.x), 2012-06-20
Supplement: zsc0041-0617-SD5.pdf [file zsc0041-0617-SD5.pdf]

**Supplementary Table S2** Primers used for amplification and sequencing. Alternative primers used to amplify certain difficult samples are indicated with 'alt'. Primers used exclusively as internal sequencing primers are indicated with 'int'.

| Target fragment    | Ta      | Primer      | Direction | Primer site | Sequence                                   | Reference                                             |
|--------------------|---------|-------------|-----------|-------------|--------------------------------------------|-------------------------------------------------------|
| COI (5'-end)       | 45°C    | LCO1490     | F         | COI         | GGT CAA CAA ATC ATA AAG ATA TTG G          | Folmer <i>et al.</i> 1994 <sup>1</sup>                |
|                    |         | TY-J-1460   | F (alt)   | Tyr         | TAC AAT TTA TCG CCT AAA CTT CAG CC         | Simon <i>et al.</i> 1994 <sup>2</sup>                 |
|                    |         | C1-2416ra   | R         | COI         | GCT AAT CAT CTA AAA ATT TTA ATT CC         | Modification of C1-J-2441 (Simon <i>et al.</i> 1994)  |
| COI (3'-end)       | 56°C    | C1-J-2183   | F         | COI         | CAA CAT TTA TTT TGA TTT TTT GG             | Simon <i>et al.</i> 1994                              |
|                    |         | TL2-N-3014  | R         | Leu2        | TCC AAT GCA CTA ATC TGC CAT ATT A          | Simon <i>et al.</i> 1994                              |
| Leu2 + COII        | 49°C    | C1-2441 fa  | F         | COI         | CCT ACA GGA ATT AAA ATT TTT AGT TGA TAA GC | Modification of C1-J-2441 (Simon <i>et al.</i> 1994)  |
|                    |         | C2-3045 fa  | F (int)   | Leu2        | CAG ATT AGT GCA ATG GAT TTA AGC            | Modification of TL2-J-3037 (Simon <i>et al.</i> 1994) |
|                    |         | C2-3772 ra  | R         | COII        | GAG ACC ATT ACT TAC TTT CAG CCA TCT        | Modification of TK-N-3785 (Simon <i>et al.</i> 1994)  |
|                    |         | C2-N-3661   | R (alt)   | COII        | CCA CAA ATT TCT GAA CAT TGA CCA            | Simon <i>et al.</i> 1994                              |
| 16S + Leu1 + NADH1 | 51-53°C | LR-N-13398  | F         | 16S         | CGC CTG TTT AAC AAA AAC AT                 | Simon <i>et al.</i> 1994                              |
|                    |         | LR-N-13398c | F (alt)   | 16S         | CGC CTG TTT ATT AAA AAC AT                 | Modification of LR-N-13398 (Simon <i>et al.</i> 1994) |
|                    |         | LR-N-13397  | F (alt)   | 16S         | CGC CTG TTT ATC AAA AAC ATS                | Modification of LR-N-13398 (Simon <i>et al.</i> 1994) |
|                    |         | N1-J-12585  | R         | NADH1       | GGT CCC TTA CGA ATT TGA ATA TAT CCT        | Simon <i>et al.</i> 1994                              |
|                    |         | N1-J-12584a | R (alt)   | NADH1       | GGT CCC TTA CGA ATT TGA ATA TAT CC         | Modification of N1-J-12585 (Simon <i>et al.</i> 1994) |
|                    |         | N1-J-12530a | R (alt)   | NADH1       | GCA TCT CTA AAA GGT TG                     | New                                                   |
| 18S                | 58°C    | 18s ai      | F         | 18S         | CCT GAG AAA CGG CTA CCA CAT C              | Whiting <i>et al.</i> 1997 <sup>3</sup>               |
|                    |         | 18s bi      | R         | 18S         | GAG TCT CGT TCG TTA TCG GA                 | Whiting <i>et al.</i> 1997                            |

1) Folmer, O., Black, M., Hoeh, W., Lutz, R. & Vrijenhoek, R. (1994). DNA primers for amplification of mitochondrial cytochrome c oxidase subunit I from diverse metazoan invertebrates. *Molecular Marine Biology and Biotechnology*, 3, 294–299.

2) Simon, C., Frati, F., Beckenbach, A., Crespi, B., Liu, H. & Flook, P. (1994). Evolution, Weighting, and Phylogenetic Utility of Mitochondrial Gene Sequences and a Compilation of Conserved Polymerase Chain Reaction Primers. *Annals of the Entomological Society of America*, 87, 651–701.

3) Whiting, M. F., Carpenter, J. C., Wheeler, Q. D. & Wheeler, W. C. (1997). The Strepsiptera Problem: Phylogeny of the Holometabolous Insect Orders Inferred from 18S and 28S Ribosomal DNA Sequences and Morphology. *Systematic Biology*, 46, 1–68.
