# Supplementary material for: Molecular phylogeny of the Athetini–Lomechusini–Ecitocharini clade of aleocharine rove beetles (Insecta)
Source: PubMed Central journal article supplement (PMC3532658; doi:10.1111/j.1463-6409.2012.00553.x), 2012-06-20
Supplement: zsc0041-0617-SD6.pdf [file zsc0041-0617-SD6.pdf]

**Supplementary Table S3** Alignment statistics on the molecular markers used in the study. The four genes COI, COII, 16S and 18S account for 94% of the total alignment, or 3568 sites.

| Gene                 | Length | Partition           | Sites      |                      |                            |                          | TOTAL       |
|----------------------|--------|---------------------|------------|----------------------|----------------------------|--------------------------|-------------|
|                      |        |                     | Excluded   | Included<br>Constant | Variable                   |                          |             |
|                      |        |                     |            |                      | Parsimony<br>uninformative | Parsimony<br>informative |             |
| 16S                  | 650    | Paired sites        | -          | 139                  | 17                         | 93                       | 249         |
|                      |        | Unpaired sites      | 160        | 146                  | 14                         | 81                       | 401         |
| Leu1                 | 71     | Paired sites        | -          | 22                   | 4                          | 12                       | 38          |
|                      |        | Unpaired sites      | 10         | 16                   | -                          | 7                        | 33          |
| NADH1                | 54     | 1st codon positions | -          | 1                    | 1                          | 16                       | 18          |
|                      |        | 2nd codon positions | -          | 8                    | 1                          | 9                        | 18          |
|                      |        | 3rd codon positions | -          | 2                    | -                          | 16                       | 18          |
| 18S                  | 944    | Paired sites        | 38         | 334                  | 8                          | 80                       | 460         |
|                      |        | Unpaired sites      | 42         | 329                  | 11                         | 102                      | 484         |
| COI                  | 1461   | 1st codon positions | 1          | 297                  | 15                         | 174                      | 487         |
|                      |        | 2nd codon positions | 1          | 409                  | 14                         | 63                       | 487         |
|                      |        | 3rd codon positions | 1          | 8                    | 5                          | 473                      | 487         |
| COI-Leu2<br>boundary | 10     | Undefined           | 10         | -                    | -                          | -                        | 10          |
| Leu2                 | 83     | Paired sites        | -          | 22                   | 5                          | 13                       | 40          |
|                      |        | Unpaired sites      | 21         | 13                   | -                          | 9                        | 43          |
| COII                 | 513    | 1st codon positions | -          | 79                   | 13                         | 79                       | 171         |
|                      |        | 2nd codon positions | -          | 123                  | 9                          | 39                       | 171         |
|                      |        | 3rd codon positions | -          | 4                    | 6                          | 161                      | 171         |
| <b>TOTAL:</b>        |        |                     | <b>284</b> | <b>1952</b>          | <b>123</b>                 | <b>1427</b>              | <b>3786</b> |
